# Supplementary material
Source: publisher figshare collection journal article supplement (https://sage.figshare.com/ndownloader/files/45129692)
Supplement: Supplementary file 1 [file 45129692]

## Sheet: PARS
Apps	Exodus Link	Trackers	Permissions	Dangerous	% dangerous	PARS*
401Health	https://reports.exodus-privacy.eu.org/en/reports/com.ri.crushcovid/latest/	2	7	0	0	13
Aarogya Setu	https://reports.exodus-privacy.eu.org/en/reports/nic.goi.aarogyasetu/latest/	2	15	5	0.333333	31
Alhosn	https://reports.exodus-privacy.eu.org/en/reports/doh.health.shield/latest/	0	27	3	0.111111	33
ArriveCAN	https://reports.exodus-privacy.eu.org/reports/ca.gc.cbsa.coronavirus/latest	2	9	2	0.222222	19
CANImmunize	https://reports.exodus-privacy.eu.org/reports/ca.ohri.immunizeapp/latest	6	21	9	0.428571	57
CLEAR	https://reports.exodus-privacy.eu.org/reports/com.clearme.clearapp/latest	6	14	4	0.285714	40
CommonHealth	https://reports.exodus-privacy.eu.org/en/reports/org.thecommonsproject.android.phr/latest/	0	11	1	0.0909091	13
ConecteSUS	https://reports.exodus-privacy.eu.org/reports/br.gov.datasus.cnsdigital/latest	1	13	6	0.461538	28
Coronapas	https://reports.exodus-privacy.eu.org/reports/dk.sum.ssicpas/latest	0	9	1	0.111111	11
Coronavirus UY	https://reports.exodus-privacy.eu.org/reports/uy.gub.salud.plancovid19uy/latest	4	29	4	0.137931	49
Covid Cert	https://reports.exodus-privacy.eu.org/reports/ch.admin.bag.covidcertificate.wallet/latest	0	6	1	0.166667	8
COVIDCert NI	https://reports.exodus-privacy.eu.org/reports/net.hscni.covidcertni/latest	2	4	1	0.25	12
DHA	https://reports.exodus-privacy.eu.org/reports/ae.gov.dha.flagship/latest	3	26	12	0.461538	59
e-Tǝbib	https://reports.exodus-privacy.eu.org/reports/az.gov.etabib/latest	6	16	4	0.25	42
EarthMed GO	https://reports.exodus-privacy.eu.org/reports/org.un.medical.droidearthmed/latest	0	9	6	0.666667	21
Egypt Health Passport	https://reports.exodus-privacy.eu.org/reports/get.pid.egypt.health.passport/latest	1	11	3	0.272727	20
EHTERAZ	https://reports.exodus-privacy.eu.org/reports/com.moi.covid19/latest	1	19	5	0.263158	32
GHA COVID Pass	https://reports.exodus-privacy.eu.org/reports/com.gha.gibraltarvaccineapp/latest	1	3	1	0.333333	8
Healthy Together	https://reports.exodus-privacy.eu.org/reports/co.twenty.stop.spread/latest	3	14	2	0.142857	27
HMH Well	https://reports.exodus-privacy.eu.org/reports/com.hackensack.umc/latest	3	17	6	0.352941	38
Immune	https://reports.exodus-privacy.eu.org/reports/com.mohkuwait.immune/latest	2	12	2	0.166667	22
immuny	https://reports.exodus-privacy.eu.org/reports/de.immuny/latest	1	10	2	0.2	17
LA Wallet	https://reports.exodus-privacy.eu.org/reports/gov.la.omv.lawallet/latest	3	13	4	0.307692	30
LeaveHomeSafe	https://reports.exodus-privacy.eu.org/reports/hk.gov.ogcio.leavehomesafe/latest	0	11	1	0.0909091	13
Life Fits Home	https://reports.exodus-privacy.eu.org/reports/tr.gov.saglik.hayatevesigar/latest	3	24	8	0.333333	49
mojelKP	https://reports.exodus-privacy.eu.org/reports/pl.gov.cez.mojeikp/latest	2	9	0	0	15
My Bindle	https://reports.exodus-privacy.eu.org/reports/com.bindlesystems.holderapp/latest	0	9	5	0.555556	19
myColorado	https://reports.exodus-privacy.eu.org/reports/com.soc.mycolorado/latest	2	14	4	0.285714	28
MySejahtera	https://reports.exodus-privacy.eu.org/reports/my.gov.onegovappstore.mysejahtera/latest	1	19	9	0.473684	40
NHS App	https://reports.exodus-privacy.eu.org/reports/com.nhs.online.nhsonline/latest	1	13	5	0.384615	26
NLVaxPass	https://reports.exodus-privacy.eu.org/en/reports/ca.nl.gov.nlvaxpassandroid/latest/	0	9	3	0.333333	15
NYC COVID SAFE	https://reports.exodus-privacy.eu.org/en/reports/gov.nyc.doitt.covidsafe/latest/	1	6	1	0.166667	11
NYS Excelsior Pass Wallet	https://reports.exodus-privacy.eu.org/en/reports/gov.ny.its.healthpassport.wallet/latest/	2	6	2	0.333333	16
Pak Vaccination Pass	https://reports.exodus-privacy.eu.org/en/reports/pk.gov.nadra.nims.certificate/latest/	0	3	1	0.333333	5
PC-Covid	https://reports.exodus-privacy.eu.org/en/reports/com.mic.bluezone/latest/	3	37	8	0.216216	62
PeduliLindungi	https://reports.exodus-privacy.eu.org/reports/com.telkom.tracencare/latest	3	16	6	0.375	37
PocketVAX	https://reports.exodus-privacy.eu.org/reports/com.pocketvax/latest	1	26	5	0.192308	39
Service NSW	https://reports.exodus-privacy.eu.org/reports/au.gov.nsw.service/latest	2	18	1	0.0555556	26
Siqi	https://reports.exodus-privacy.eu.org/reports/com.unitedsolutions.siqi/latest	0	11	6	0.545455	23
Surokkha	https://reports.exodus-privacy.eu.org/reports/com.codersbucket.surokkha_app/latest	0	2	0	0	2
Tarassud+	https://reports.exodus-privacy.eu.org/reports/om.gov.moh.tarassudapplication/latest	3	19	5	0.263158	38
Tawakkalna (Covid-19 KSA)	https://reports.exodus-privacy.eu.org/reports/sa.gov.nic.tawakkalna/latest	3	20	4	0.2	37
Tečka	https://reports.exodus-privacy.eu.org/reports/cz.nakit.eocko.wallet/latest	2	7	1	0.142857	15
TousAntiCovid	https://reports.exodus-privacy.eu.org/reports/fr.gouv.android.stopcovid/latest	0	17	6	0.352941	29
TraceTogether	https://reports.exodus-privacy.eu.org/reports/sg.gov.tech.bluetrace/latest	3	23	8	0.347826	48
United Airlines	https://reports.exodus-privacy.eu.org/reports/com.united.mobile.android/latest	9	36	12	0.333333	87
VaxiCode	https://reports.exodus-privacy.eu.org/reports/ca.quebec.vaccandroid/latest	0	9	3	0.333333	15
หมอพร้อม	https://reports.exodus-privacy.eu.org/reports/com.mor.promplus/latest	2	29	6	0.206897	47
Average		1.91667	14.75	4.04167	0.268168	28.5833
SD		1.91115	8.36278	2.99616	0.147288	17.1896
Median		2	13	4	0.267943	26.5
Q1		0	9	1.5	0.166667	15
Q3		3	19	6	0.336957	38.25
IQR		3	10	4.5	0.17029	23.25
*:	Darker green cell color illustrates lower PARS (lower privacy risk), darker red illustrates higher PARS (higher privacy risk).
	Click on column header to toggle view list ascending/descending

## Sheet: Permissions
Permissions	Dangerous/special	Number of apps	% of apps	Risk scoreb
CAMERA	Y	41	0.854167	2
ACCESS_FINE_LOCATION	Y	23	0.479167	2
ACCESS_COARSE_LOCATION	Y	21	0.4375	2
WRITE_EXTERNAL_STORAGE	Y	21	0.4375	2
READ_EXTERNAL_STORAGE	Y	20	0.416667	2
WRITE_SETTINGS	Y	14	0.291667	2
ACCESS_BACKGROUND_LOCATION	Y	8	0.166667	2
CALL_PHONE	Y	7	0.145833	2
RECORD_AUDIO	Y	6	0.125	2
BLUETOOTH_SCAN	Y	5	0.104167	2
SYSTEM_ALERT_WINDOW	Y	5	0.104167	2
BLUETOOTH_CONNECT	Y	4	0.0833333	2
WRITE_CALENDAR	Y	4	0.0833333	2
BLUETOOTH_ADVERTISE	Y	3	0.0625	2
READ_PHONE_STATE	Y	3	0.0625	2
READ_CALENDAR	Y	2	0.0416667	2
READ_CONTACTS	Y	2	0.0416667	2
ACTIVITY_RECOGNITION	Y	1	0.0208333	2
GET_ACCOUNTS	Y	1	0.0208333	2
INTERNET	N	47	0.979167	1
ACCESS_NETWORK_STATE	N	43	0.895833	1
WAKE_LOCK	N	40	0.833333	1
BIND_GET_INSTALL_REFERRER_SERVICE	N	33	0.6875	1
RECEIVE	N	32	0.666667	1
VIBRATE	N	27	0.5625	1
FOREGROUND_SERVICE	N	26	0.541667	1
RECEIVE_BOOT_COMPLETED	N	25	0.520833	1
USE_FINGERPRINT	N	20	0.416667	1
USE_BIOMETRIC	N	19	0.395833	1
BLUETOOTH	N	15	0.3125	1
READ_SETTINGS	N	15	0.3125	1
ACCESS_WIFI_STATE	N	14	0.291667	1
BLUETOOTH_ADMIN	N	11	0.229167	1
FLASHLIGHT	N	8	0.166667	1
REQUEST_INSTALL_PACKAGES	N	7	0.145833	1
READ	N	6	0.125	1
BADGE_COUNT_READ	N	5	0.104167	1
BADGE_COUNT_WRITE	N	5	0.104167	1
BROADCAST_BADGE	N	5	0.104167	1
CHANGE_BADGE	N	5	0.104167	1
GET_COMMON_DATA	N	5	0.104167	1
NFC	N	5	0.104167	1
PROVIDER_INSERT_BADGE	N	5	0.104167	1
READ_APP_BADGE	N	5	0.104167	1
REQUEST_IGNORE_BATTERY_OPTIMIZATIONS	N	5	0.104167	1
UPDATE_BADGE	N	5	0.104167	1
UPDATE_COUNT	N	5	0.104167	1
UPDATE_SHORTCUT	N	5	0.104167	1
WRITE	N	5	0.104167	1
AD_ID	N	4	0.0833333	1
MODIFY_AUDIO_SETTINGS	N	4	0.0833333	1
PROCESS_PUSH_MSG	N	4	0.0833333	1
PUSH_PROVIDER	N	4	0.0833333	1
CHANGE_NETWORK_STATE	N	3	0.0625	1
CHECK_LICENSE	N	3	0.0625	1
C2D_MESSAGE	N	2	0.0416667	1
CHANGE_WIFI_STATE	N	2	0.0416667	1
GET_TASKS	N	2	0.0416667	1
POST_NOTIFICATIONS	N	2	0.0416667	1
READ_GSERVICES	N	2	0.0416667	1
SCHEDULE_EXACT_ALARM	N	2	0.0416667	1
WRITE_USE_APP_FEATURE_SURVEY	N	2	0.0416667	1
ACCESS_IFESERVICE	N	1	0.0208333	1
ACCESS_NETWORK_STPermisATE	N	1	0.0208333	1
ACCESS_NOTIFICATION_POLICY	N	1	0.0208333	1
AUDIO_CAPTURE	N	1	0.0208333	1
AUTHENTICATE_ACCOUNTS	N	1	0.0208333	1
BROADCAST_CLOSE_SYSTEM_DIALOGS	N	1	0.0208333	1
CAPTURE_AUDIO_OUTPUT	N	1	0.0208333	1
DECODE	N	1	0.0208333	1
DISABLE_KEYGUARD	N	1	0.0208333	1
DYNAMIC_RECEIVER_NOT_EXPORTED_PERMISSION	N	1	0.0208333	1
QUICKBOOT_POWERON	N	1	0.0208333	1
REBOOT	N	1	0.0208333	1
REORDER_TASKS	N	1	0.0208333	1
USE_COMPONENT	N	1	0.0208333	1
USE_CREDENTIALS	N	1	0.0208333	1
USE_FULL_SCREEN_INTENT	N	1	0.0208333	1
VIDEO_CAPTURE	N	1	0.0208333	1
WRITE_INTERNAL_STORAGE	N	1	0.0208333	1
Total Permissions		698
Note: “!” indicates a dangerous or ‘special’ level according to Google Developers. [62]; b Risk score based on the book: Android Application Security Essentials [63].

## Sheet: Trackers
Trackers	Number of apps	% of apps
Google Firebase Analytics	31	0.645833
Google CrashLytics	18	0.375
AltBeacon	6	0.125
Huawei Mobile Services (HMS) Core	5	0.104167
Facebook Analytics	2	0.0416667
Facebook Login	2	0.0416667
Facebook Share	2	0.0416667
Google AdMob	2	0.0416667
Mapbox	2	0.0416667
Microsoft Visual Studio App Center Analytics	2	0.0416667
Appcelerator Analytics	1	0.0208333
Appdynamics	1	0.0208333
Branch	1	0.0208333
Braze (formerly Appboy)	1	0.0208333
Button	1	0.0208333
Facebook Places	1	0.0208333
Heap	1	0.0208333
Inmobi	1	0.0208333
Jumio	1	0.0208333
Kochava	1	0.0208333
Localytics	1	0.0208333
Locuslabs	1	0.0208333
New Relic	1	0.0208333
OneSignal	1	0.0208333
OpenTelemetry (OpenCensus, OpenTracing)	1	0.0208333
Qualtrics	1	0.0208333
Split	1	0.0208333
Splunk MINT	1	0.0208333

## Sheet: Permissions - Details
App	Permission	Description	‘Dangerous’/‘Special’
Aarogya Setu	ACCESS_BACKGROUND_LOCATION	access location in the background	Y
DHA	ACCESS_BACKGROUND_LOCATION	access location in the background	Y
EHTERAZ	ACCESS_BACKGROUND_LOCATION	access location in the background	Y
Life Fits Into Home	ACCESS_BACKGROUND_LOCATION	access location in the background	Y
MySejahtera	ACCESS_BACKGROUND_LOCATION	access location in the background	Y
PC-Covid	ACCESS_BACKGROUND_LOCATION	access location in the background	Y
Tawakkalna (Covid-19 KSA)	ACCESS_BACKGROUND_LOCATION	access location in the background	Y
TraceTogether	ACCESS_BACKGROUND_LOCATION	access location in the background	Y
Aarogya Setu	ACCESS_COARSE_LOCATION	access approximate location only in the foreground	Y
CANImmunize	ACCESS_COARSE_LOCATION	access approximate location only in the foreground	Y
CLEAR	ACCESS_COARSE_LOCATION	access approximate location only in the foreground	Y
ConecteSUS	ACCESS_COARSE_LOCATION	access approximate location only in the foreground	Y
DHA	ACCESS_COARSE_LOCATION	access approximate location only in the foreground	Y
e-Tǝbib	ACCESS_COARSE_LOCATION	access approximate location only in the foreground	Y
EHTERAZ	ACCESS_COARSE_LOCATION	access approximate location only in the foreground	Y
HMH Well	ACCESS_COARSE_LOCATION	access approximate location only in the foreground	Y
LA Wallet	ACCESS_COARSE_LOCATION	access approximate location only in the foreground	Y
Life Fits Into Home	ACCESS_COARSE_LOCATION	access approximate location only in the foreground	Y
My Bindle	ACCESS_COARSE_LOCATION	access approximate location only in the foreground	Y
MySejahtera	ACCESS_COARSE_LOCATION	access approximate location only in the foreground	Y
NHS App	ACCESS_COARSE_LOCATION	access approximate location only in the foreground	Y
PC-Covid	ACCESS_COARSE_LOCATION	access approximate location only in the foreground	Y
Siqi	ACCESS_COARSE_LOCATION	access approximate location only in the foreground	Y
Tarassud+	ACCESS_COARSE_LOCATION	access approximate location only in the foreground	Y
Tawakkalna (Covid-19 KSA)	ACCESS_COARSE_LOCATION	access approximate location only in the foreground	Y
TousAntiCovid	ACCESS_COARSE_LOCATION	access approximate location only in the foreground	Y
TraceTogether	ACCESS_COARSE_LOCATION	access approximate location only in the foreground	Y
United Airlines	ACCESS_COARSE_LOCATION	access approximate location only in the foreground	Y
หมอพร้อม	ACCESS_COARSE_LOCATION	access approximate location only in the foreground	Y
Aarogya Setu	ACCESS_FINE_LOCATION	access precise location only in the foreground	Y
CANImmunize	ACCESS_FINE_LOCATION	access precise location only in the foreground	Y
CLEAR	ACCESS_FINE_LOCATION	access precise location only in the foreground	Y
ConecteSUS	ACCESS_FINE_LOCATION	access precise location only in the foreground	Y
DHA	ACCESS_FINE_LOCATION	access precise location only in the foreground	Y
e-Tǝbib	ACCESS_FINE_LOCATION	access precise location only in the foreground	Y
EHTERAZ	ACCESS_FINE_LOCATION	access precise location only in the foreground	Y
HMH Well	ACCESS_FINE_LOCATION	access precise location only in the foreground	Y
LA Wallet	ACCESS_FINE_LOCATION	access precise location only in the foreground	Y
Life Fits Into Home	ACCESS_FINE_LOCATION	access precise location only in the foreground	Y
My Bindle	ACCESS_FINE_LOCATION	access precise location only in the foreground	Y
myColorado	ACCESS_FINE_LOCATION	access precise location only in the foreground	Y
MySejahtera	ACCESS_FINE_LOCATION	access precise location only in the foreground	Y
NHS App	ACCESS_FINE_LOCATION	access precise location only in the foreground	Y
PC-Covid	ACCESS_FINE_LOCATION	access precise location only in the foreground	Y
PeduliLindungi	ACCESS_FINE_LOCATION	access precise location only in the foreground	Y
Siqi	ACCESS_FINE_LOCATION	access precise location only in the foreground	Y
Tarassud+	ACCESS_FINE_LOCATION	access precise location only in the foreground	Y
Tawakkalna (Covid-19 KSA)	ACCESS_FINE_LOCATION	access precise location only in the foreground	Y
TousAntiCovid	ACCESS_FINE_LOCATION	access precise location only in the foreground	Y
TraceTogether	ACCESS_FINE_LOCATION	access precise location only in the foreground	Y
United Airlines	ACCESS_FINE_LOCATION	access precise location only in the foreground	Y
หมอพร้อม	ACCESS_FINE_LOCATION	access precise location only in the foreground	Y
United Airlines	ACCESS_IFESERVICE	.	N
401Health	ACCESS_NETWORK_STATE	view network connections	N
Aarogya Setu	ACCESS_NETWORK_STATE	view network connections	N
Alhosn	ACCESS_NETWORK_STATE	view network connections	N
ArriveCAN	ACCESS_NETWORK_STATE	view network connections	N
CANImmunize	ACCESS_NETWORK_STATE	view network connections	N
CLEAR	ACCESS_NETWORK_STATE	view network connections	N
CommonHealth	ACCESS_NETWORK_STATE	view network connections	N
ConecteSUS	ACCESS_NETWORK_STATE	view network connections	N
Coronapas	ACCESS_NETWORK_STATE	view network connections	N
Coronavirus UY	ACCESS_NETWORK_STATE	view network connections	N
Covid Cert	ACCESS_NETWORK_STATE	view network connections	N
COVIDCert NI	ACCESS_NETWORK_STATE	view network connections	N
DHA	ACCESS_NETWORK_STATE	view network connections	N
e-Tǝbib	ACCESS_NETWORK_STATE	view network connections	N
Egypt Health Passport	ACCESS_NETWORK_STATE	view network connections	N
EHTERAZ	ACCESS_NETWORK_STATE	view network connections	N
GHA COVID Pass	ACCESS_NETWORK_STATE	view network connections	N
Healthy Together	ACCESS_NETWORK_STATE	view network connections	N
HMH Well	ACCESS_NETWORK_STATE	view network connections	N
Immune	ACCESS_NETWORK_STATE	view network connections	N
immuny	ACCESS_NETWORK_STATE	view network connections	N
LA Wallet	ACCESS_NETWORK_STATE	view network connections	N
Life Fits Into Home	ACCESS_NETWORK_STATE	view network connections	N
mojelKP	ACCESS_NETWORK_STATE	view network connections	N
My Bindle	ACCESS_NETWORK_STATE	view network connections	N
myColorado	ACCESS_NETWORK_STATE	view network connections	N
MySejahtera	ACCESS_NETWORK_STATE	view network connections	N
NHS App	ACCESS_NETWORK_STATE	view network connections	N
NLVaxPass	ACCESS_NETWORK_STATE	view network connections	N
NYC COVID SAFE	ACCESS_NETWORK_STATE	view network connections	N
NYS Excelsior Pass Wallet	ACCESS_NETWORK_STATE	view network connections	N
Pak Vaccination Pass	ACCESS_NETWORK_STATE	view network connections	N
PC-Covid	ACCESS_NETWORK_STATE	view network connections	N
PeduliLindungi	ACCESS_NETWORK_STATE	view network connections	N
PocketVax	ACCESS_NETWORK_STATE	view network connections	N
Service NSW	ACCESS_NETWORK_STATE	view network connections	N
Tarassud+	ACCESS_NETWORK_STATE	view network connections	N
Tawakkalna (Covid-19 KSA)	ACCESS_NETWORK_STATE	view network connections	N
Tečka	ACCESS_NETWORK_STATE	view network connections	N
TousAntiCovid	ACCESS_NETWORK_STATE	view network connections	N
TraceTogether	ACCESS_NETWORK_STATE	view network connections	N
United Airlines	ACCESS_NETWORK_STATE	view network connections	N
หมอพร้อม	ACCESS_NETWORK_STATE	view network connections	N
Aarogya Setu	ACCESS_NETWORK_STPermisATE	.	N
Service NSW	ACCESS_NOTIFICATION_POLICY	access Do Not Disturb	N
CANImmunize	ACCESS_WIFI_STATE	view Wi-Fi connections	N
CommonHealth	ACCESS_WIFI_STATE	view WiFi connections	N
COVIDCert NI	ACCESS_WIFI_STATE	view Wi-Fi connections	N
DHA	ACCESS_WIFI_STATE	view Wi-Fi connections	N
e-Tǝbib	ACCESS_WIFI_STATE	view Wi-Fi connections	N
EHTERAZ	ACCESS_WIFI_STATE	view Wi-Fi connections	N
Healthy Together	ACCESS_WIFI_STATE	view Wi-Fi connections	N
Life Fits Into Home	ACCESS_WIFI_STATE	view Wi-Fi connections	N
myColorado	ACCESS_WIFI_STATE	view Wi-Fi connections	N
PC-Covid	ACCESS_WIFI_STATE	view Wi-Fi connections	N
Service NSW	ACCESS_WIFI_STATE	view Wi-Fi connections	N
TousAntiCovid	ACCESS_WIFI_STATE	view Wi-Fi connections	N
United Airlines	ACCESS_WIFI_STATE	view Wi-Fi connections	N
หมอพร้อม	ACCESS_WIFI_STATE	view Wi-Fi connections	N
DHA	ACTIVITY_RECOGNITION	recognize physical activity	Y
Alhosn	AD_ID	.	N
ArriveCAN	AD_ID	.	N
PeduliLindungi	AD_ID	.	N
Service NSW	AD_ID	.	N
United Airlines	AUDIO_CAPTURE	.	N
immuny	AUTHENTICATE_ACCOUNTS	.	N
Alhosn	BADGE_COUNT_READ	.	N
Coronavirus UY	BADGE_COUNT_READ	.	N
PC-Covid	BADGE_COUNT_READ	.	N
PocketVax	BADGE_COUNT_READ	.	N
หมอพร้อม	BADGE_COUNT_READ	.	N
Alhosn	BADGE_COUNT_WRITE	.	N
Coronavirus UY	BADGE_COUNT_WRITE	.	N
PC-Covid	BADGE_COUNT_WRITE	.	N
PocketVax	BADGE_COUNT_WRITE	.	N
หมอพร้อม	BADGE_COUNT_WRITE	.	N
401Health	BIND_GET_INSTALL_REFERRER_SERVICE	.	N
Aarogya Setu	BIND_GET_INSTALL_REFERRER_SERVICE	.	N
Alhosn	BIND_GET_INSTALL_REFERRER_SERVICE	.	N
ArriveCAN	BIND_GET_INSTALL_REFERRER_SERVICE	.	N
CANImmunize	BIND_GET_INSTALL_REFERRER_SERVICE	.	N
CLEAR	BIND_GET_INSTALL_REFERRER_SERVICE	.	N
CommonHealth	BIND_GET_INSTALL_REFERRER_SERVICE	.	N
ConecteSUS	BIND_GET_INSTALL_REFERRER_SERVICE	.	N
Coronavirus UY	BIND_GET_INSTALL_REFERRER_SERVICE	.	N
DHA	BIND_GET_INSTALL_REFERRER_SERVICE	.	N
e-Tǝbib	BIND_GET_INSTALL_REFERRER_SERVICE	.	N
Egypt Health Passport	BIND_GET_INSTALL_REFERRER_SERVICE	.	N
EHTERAZ	BIND_GET_INSTALL_REFERRER_SERVICE	.	N
Healthy Together	BIND_GET_INSTALL_REFERRER_SERVICE	.	N
HMH Well	BIND_GET_INSTALL_REFERRER_SERVICE	.	N
Immune	BIND_GET_INSTALL_REFERRER_SERVICE	.	N
immuny	BIND_GET_INSTALL_REFERRER_SERVICE	.	N
Life Fits Into Home	BIND_GET_INSTALL_REFERRER_SERVICE	.	N
mojelKP	BIND_GET_INSTALL_REFERRER_SERVICE	.	N
myColorado	BIND_GET_INSTALL_REFERRER_SERVICE	.	N
NHS App	BIND_GET_INSTALL_REFERRER_SERVICE	.	N
NLVaxPass	BIND_GET_INSTALL_REFERRER_SERVICE	.	N
NYS Excelsior Pass Wallet	BIND_GET_INSTALL_REFERRER_SERVICE	.	N
PC-Covid	BIND_GET_INSTALL_REFERRER_SERVICE	.	N
PeduliLindungi	BIND_GET_INSTALL_REFERRER_SERVICE	.	N
PocketVax	BIND_GET_INSTALL_REFERRER_SERVICE	.	N
Service NSW	BIND_GET_INSTALL_REFERRER_SERVICE	.	N
Tarassud+	BIND_GET_INSTALL_REFERRER_SERVICE	.	N
Tawakkalna (Covid-19 KSA)	BIND_GET_INSTALL_REFERRER_SERVICE	.	N
Tečka	BIND_GET_INSTALL_REFERRER_SERVICE	.	N
TraceTogether	BIND_GET_INSTALL_REFERRER_SERVICE	.	N
United Airlines	BIND_GET_INSTALL_REFERRER_SERVICE	.	N
หมอพร้อม	BIND_GET_INSTALL_REFERRER_SERVICE	.	N
Aarogya Setu	BLUETOOTH	pair with Bluetooth devices	N
CANImmunize	BLUETOOTH	pair with Bluetooth devices	N
Coronavirus UY	BLUETOOTH	pair with Bluetooth devices	N
e-Tǝbib	BLUETOOTH	pair with Bluetooth devices	N
EHTERAZ	BLUETOOTH	pair with Bluetooth devices	N
Life Fits Into Home	BLUETOOTH	pair with Bluetooth devices	N
MySejahtera	BLUETOOTH	pair with Bluetooth devices	N
PC-Covid	BLUETOOTH	pair with Bluetooth devices	N
PeduliLindungi	BLUETOOTH	pair with Bluetooth devices	N
Siqi	BLUETOOTH	pair with Bluetooth devices	N
Tarassud+	BLUETOOTH	pair with Bluetooth devices	N
Tawakkalna (Covid-19 KSA)	BLUETOOTH	pair with Bluetooth devices	N
TousAntiCovid	BLUETOOTH	pair with Bluetooth devices	N
TraceTogether	BLUETOOTH	pair with Bluetooth devices	N
United Airlines	BLUETOOTH	pair with Bluetooth devices	N
Aarogya Setu	BLUETOOTH_ADMIN	access Bluetooth settings	N
e-Tǝbib	BLUETOOTH_ADMIN	access Bluetooth settings	N
EHTERAZ	BLUETOOTH_ADMIN	access Bluetooth settings	N
Life Fits Into Home	BLUETOOTH_ADMIN	access Bluetooth settings	N
MySejahtera	BLUETOOTH_ADMIN	access Bluetooth settings	N
PC-Covid	BLUETOOTH_ADMIN	access Bluetooth settings	N
Tarassud+	BLUETOOTH_ADMIN	access Bluetooth settings	N
Tawakkalna (Covid-19 KSA)	BLUETOOTH_ADMIN	access Bluetooth settings	N
TousAntiCovid	BLUETOOTH_ADMIN	access Bluetooth settings	N
TraceTogether	BLUETOOTH_ADMIN	access Bluetooth settings	N
United Airlines	BLUETOOTH_ADMIN	access Bluetooth settings	N
MySejahtera	BLUETOOTH_ADVERTISE	advertise to nearby Bluetooth devices	Y
TousAntiCovid	BLUETOOTH_ADVERTISE	advertise to nearby Bluetooth devices	Y
TraceTogether	BLUETOOTH_ADVERTISE	advertise to nearby Bluetooth devices	Y
DHA	BLUETOOTH_CONNECT	connect to paired Bluetooth devices	Y
PeduliLindungi	BLUETOOTH_CONNECT	connect to paired Bluetooth devices	Y
TousAntiCovid	BLUETOOTH_CONNECT	connect to paired Bluetooth devices	Y
TraceTogether	BLUETOOTH_CONNECT	connect to paired Bluetooth devices	Y
DHA	BLUETOOTH_SCAN	discover and pair nearby Bluetooth devices	Y
MySejahtera	BLUETOOTH_SCAN	discover and pair nearby Bluetooth devices	Y
PeduliLindungi	BLUETOOTH_SCAN	discover and pair nearby Bluetooth devices	Y
TousAntiCovid	BLUETOOTH_SCAN	discover and pair nearby Bluetooth devices	Y
TraceTogether	BLUETOOTH_SCAN	discover and pair nearby Bluetooth devices	Y
Alhosn	BROADCAST_BADGE	.	N
Coronavirus UY	BROADCAST_BADGE	.	N
PC-Covid	BROADCAST_BADGE	.	N
PocketVax	BROADCAST_BADGE	.	N
หมอพร้อม	BROADCAST_BADGE	.	N
Service NSW	BROADCAST_CLOSE_SYSTEM_DIALOGS	.	N
Coronavirus UY	C2D_MESSAGE	.	N
PC-Covid	C2D_MESSAGE	.	N
ConecteSUS	CALL_PHONE	directly call phone numbers	Y
DHA	CALL_PHONE	directly call phone numbers	Y
e-Tǝbib	CALL_PHONE	directly call phone numbers	Y
EHTERAZ	CALL_PHONE	directly call phone numbers	Y
HMH Well	CALL_PHONE	directly call phone numbers	Y
MySejahtera	CALL_PHONE	directly call phone numbers	Y
United Airlines	CALL_PHONE	directly call phone numbers	Y
Aarogya Setu	CAMERA	take pictures and videos	Y
Alhosn	CAMERA	take pictures and videos	Y
ArriveCAN	CAMERA	take pictures and videos	Y
CANImmunize	CAMERA	take pictures and videos	Y
CLEAR	CAMERA	take pictures and videos	Y
CommonHealth	CAMERA	take pictures and videos	Y
ConecteSUS	CAMERA	take pictures and videos	Y
Coronapas	CAMERA	take pictures and videos	Y
Coronavirus UY	CAMERA	take pictures and videos	Y
Covid Cert	CAMERA	take pictures and videos	Y
COVIDCert NI	CAMERA	take pictures and videos	Y
DHA	CAMERA	take pictures and videos	Y
e-Tǝbib	CAMERA	take pictures and videos	Y
EarthMed GO	CAMERA	take pictures and videos	Y
Egypt Health Passport	CAMERA	take pictures and videos	Y
Healthy Together	CAMERA	take pictures and videos	Y
HMH Well	CAMERA	take pictures and videos	Y
immuny	CAMERA	take pictures and videos	Y
LA Wallet	CAMERA	take pictures and videos	Y
LeaveHomeSafe	CAMERA	take pictures and videos	Y
Life Fits Into Home	CAMERA	take pictures and videos	Y
My Bindle	CAMERA	take pictures and videos	Y
myColorado	CAMERA	take pictures and videos	Y
MySejahtera	CAMERA	take pictures and videos	Y
NHS App	CAMERA	take pictures and videos	Y
NLVaxPass	CAMERA	take pictures and videos	Y
NYC COVID SAFE	CAMERA	take pictures and videos	Y
NYS Excelsior Pass Wallet	CAMERA	take pictures and videos	Y
Pak Vaccination Pass	CAMERA	take pictures and videos	Y
PC-Covid	CAMERA	take pictures and videos	Y
PeduliLindungi	CAMERA	take pictures and videos	Y
PocketVax	CAMERA	take pictures and videos	Y
Service NSW	CAMERA	take pictures and videos	Y
Siqi	CAMERA	take pictures and videos	Y
Tarassud+	CAMERA	take pictures and videos	Y
Tawakkalna (Covid-19 KSA)	CAMERA	take pictures and videos	Y
Tečka	CAMERA	take pictures and videos	Y
TousAntiCovid	CAMERA	take pictures and videos	Y
TraceTogether	CAMERA	take pictures and videos	Y
United Airlines	CAMERA	take pictures and videos	Y
หมอพร้อม	CAMERA	take pictures and videos	Y
United Airlines	CAPTURE_AUDIO_OUTPUT	.	N
Alhosn	CHANGE_BADGE	.	N
Coronavirus UY	CHANGE_BADGE	.	N
PC-Covid	CHANGE_BADGE	.	N
PocketVax	CHANGE_BADGE	.	N
หมอพร้อม	CHANGE_BADGE	.	N
Coronavirus UY	CHANGE_NETWORK_STATE	change network connectivity	N
myColorado	CHANGE_NETWORK_STATE	change network connectivity	N
United Airlines	CHANGE_NETWORK_STATE	change network connectivity	N
United Airlines	CHANGE_WIFI_STATE	connect and disconnect from Wi-Fi	N
หมอพร้อม	CHANGE_WIFI_STATE	connect and disconnect from Wi-Fi	N
CANImmunize	CHECK_LICENSE	.	N
PC-Covid	CHECK_LICENSE	.	N
Service NSW	CHECK_LICENSE	.	N
Coronapas	DECODE	.	N
EHTERAZ	DISABLE_KEYGUARD	disable your screen lock	N
TousAntiCovid	DYNAMIC_RECEIVER_NOT_EXPORTED_PERMISSION	.	N
CLEAR	FLASHLIGHT	.	N
Coronapas	FLASHLIGHT	.	N
LA Wallet	FLASHLIGHT	.	N
My Bindle	FLASHLIGHT	.	N
MySejahtera	FLASHLIGHT	.	N
Siqi	FLASHLIGHT	.	N
United Airlines	FLASHLIGHT	.	N
หมอพร้อม	FLASHLIGHT	.	N
Aarogya Setu	FOREGROUND_SERVICE	run foreground service	N
CANImmunize	FOREGROUND_SERVICE	run foreground service	N
CLEAR	FOREGROUND_SERVICE	run foreground service	N
CommonHealth	FOREGROUND_SERVICE	run foreground service	N
ConecteSUS	FOREGROUND_SERVICE	run foreground service	N
Coronavirus UY	FOREGROUND_SERVICE	run foreground service	N
Covid Cert	FOREGROUND_SERVICE	run foreground service	N
DHA	FOREGROUND_SERVICE	run foreground service	N
e-Tǝbib	FOREGROUND_SERVICE	run foreground service	N
EHTERAZ	FOREGROUND_SERVICE	run foreground service	N
Healthy Together	FOREGROUND_SERVICE	run foreground service	N
HMH Well	FOREGROUND_SERVICE	run foreground service	N
Immune	FOREGROUND_SERVICE	run foreground service	N
LeaveHomeSafe	FOREGROUND_SERVICE	run foreground service	N
Life Fits Into Home	FOREGROUND_SERVICE	run foreground service	N
mojelKP	FOREGROUND_SERVICE	run foreground service	N
MySejahtera	FOREGROUND_SERVICE	run foreground service	N
PC-Covid	FOREGROUND_SERVICE	run foreground service	N
PeduliLindungi	FOREGROUND_SERVICE	run foreground service	N
Service NSW	FOREGROUND_SERVICE	run foreground service	N
Surokkha	FOREGROUND_SERVICE	run foreground service	N
Tarassud+	FOREGROUND_SERVICE	run foreground service	N
Tawakkalna (Covid-19 KSA)	FOREGROUND_SERVICE	run foreground service	N
TousAntiCovid	FOREGROUND_SERVICE	run foreground service	N
TraceTogether	FOREGROUND_SERVICE	run foreground service	N
United Airlines	FOREGROUND_SERVICE	run foreground service	N
immuny	GET_ACCOUNTS	find accounts on the device	Y
EHTERAZ	GET_COMMON_DATA	.	N
Life Fits Into Home	GET_COMMON_DATA	.	N
Tarassud+	GET_COMMON_DATA	.	N
Tawakkalna (Covid-19 KSA)	GET_COMMON_DATA	.	N
TraceTogether	GET_COMMON_DATA	.	N
Healthy Together	GET_TASKS	retrieve running apps	N
LeaveHomeSafe	GET_TASKS	retrieve running apps	N
401Health	INTERNET	have full network access	N
Aarogya Setu	INTERNET	have full network access	N
Alhosn	INTERNET	have full network access	N
ArriveCAN	INTERNET	have full network access	N
CANImmunize	INTERNET	have full network access	N
CLEAR	INTERNET	have full network access	N
CommonHealth	INTERNET	have full network access	N
CommonPass	INTERNET	have full network access	N
ConecteSUS	INTERNET	have full network access	N
Coronapas	INTERNET	have full network access	N
Coronavirus UY	INTERNET	have full network access	N
Covid Cert	INTERNET	have full network access	N
COVIDCert NI	INTERNET	have full network access	N
DHA	INTERNET	have full network access	N
e-Tǝbib	INTERNET	have full network access	N
EarthMed GO	INTERNET	have full network access	N
Egypt Health Passport	INTERNET	have full network access	N
EHTERAZ	INTERNET	have full network access	N
GHA COVID Pass	INTERNET	have full network access	N
Healthy Together	INTERNET	have full network access	N
HMH Well	INTERNET	have full network access	N
Immune	INTERNET	have full network access	N
immuny	INTERNET	have full network access	N
LA Wallet	INTERNET	have full network access	N
LeaveHomeSafe	INTERNET	have full network access	N
Life Fits Into Home	INTERNET	have full network access	N
mojelKP	INTERNET	have full network access	N
My Bindle	INTERNET	have full network access	N
myColorado	INTERNET	have full network access	N
MySejahtera	INTERNET	have full network access	N
NLVaxPass	INTERNET	have full network access	N
NYC COVID SAFE	INTERNET	have full network access	N
NYS Excelsior Pass Wallet	INTERNET	have full network access	N
Pak Vaccination Pass	INTERNET	have full network access	N
PC-Covid	INTERNET	have full network access	N
PeduliLindungi	INTERNET	have full network access	N
PocketVax	INTERNET	have full network access	N
Service NSW	INTERNET	have full network access	N
Siqi	INTERNET	have full network access	N
Surokkha	INTERNET	have full network access	N
Tarassud+	INTERNET	have full network access	N
Tawakkalna (Covid-19 KSA)	INTERNET	have full network access	N
Tečka	INTERNET	have full network access	N
TousAntiCovid	INTERNET	have full network access	N
TraceTogether	INTERNET	have full network access	N
United Airlines	INTERNET	have full network access	N
หมอพร้อม	INTERNET	have full network access	N
DHA	MODIFY_AUDIO_SETTINGS	change your audio settings	N
EarthMed GO	MODIFY_AUDIO_SETTINGS	change your audio settings	N
HMH Well	MODIFY_AUDIO_SETTINGS	change your audio settings	N
United Airlines	MODIFY_AUDIO_SETTINGS	change your audio settings	N
CLEAR	NFC	control Near Field Communication	N
Egypt Health Passport	NFC	control Near Field Communication	N
Life Fits Into Home	NFC	control Near Field Communication	N
myColorado	NFC	control Near Field Communication	N
United Airlines	NFC	control Near Field Communication	N
Alhosn	POST_NOTIFICATIONS	.	N
TousAntiCovid	POST_NOTIFICATIONS	.	N
Alhosn	PROCESS_PUSH_MSG	.	N
Tarassud+	PROCESS_PUSH_MSG	.	N
Tawakkalna (Covid-19 KSA)	PROCESS_PUSH_MSG	.	N
TraceTogether	PROCESS_PUSH_MSG	.	N
Alhosn	PROVIDER_INSERT_BADGE	.	N
Coronavirus UY	PROVIDER_INSERT_BADGE	.	N
PC-Covid	PROVIDER_INSERT_BADGE	.	N
PocketVax	PROVIDER_INSERT_BADGE	.	N
หมอพร้อม	PROVIDER_INSERT_BADGE	.	N
Alhosn	PUSH_PROVIDER	.	N
Tarassud+	PUSH_PROVIDER	.	N
Tawakkalna (Covid-19 KSA)	PUSH_PROVIDER	.	N
TraceTogether	PUSH_PROVIDER	.	N
EHTERAZ	QUICKBOOT_POWERON	.	N
Alhosn	READ	.	N
Coronavirus UY	READ	.	N
Immune	READ	.	N
PC-Covid	READ	.	N
PocketVax	READ	.	N
หมอพร้อม	READ	.	N
Alhosn	READ_APP_BADGE	.	N
Coronavirus UY	READ_APP_BADGE	.	N
PC-Covid	READ_APP_BADGE	.	N
PocketVax	READ_APP_BADGE	.	N
หมอพร้อม	READ_APP_BADGE	.	N
CANImmunize	READ_CALENDAR	read calendar events and details	Y
United Airlines	READ_CALENDAR	read calendar events and details	Y
Healthy Together	READ_CONTACTS	read your contacts	Y
Life Fits Into Home	READ_CONTACTS	read your contacts	Y
ArriveCAN	READ_EXTERNAL_STORAGE	read the contents of your shared storage	Y
CANImmunize	READ_EXTERNAL_STORAGE	read the contents of your shared storage	Y
CLEAR	READ_EXTERNAL_STORAGE	read the contents of your shared storage	Y
ConecteSUS	READ_EXTERNAL_STORAGE	read the contents of your shared storage	Y
DHA	READ_EXTERNAL_STORAGE	read the contents of your shared storage	Y
EarthMed GO	READ_EXTERNAL_STORAGE	read the contents of your shared storage	Y
Egypt Health Passport	READ_EXTERNAL_STORAGE	read the contents of your shared storage	Y
HMH Well	READ_EXTERNAL_STORAGE	read the contents of your shared storage	Y
Immune	READ_EXTERNAL_STORAGE	read the contents of your shared storage	Y
Life Fits Into Home	READ_EXTERNAL_STORAGE	read the contents of your shared storage	Y
My Bindle	READ_EXTERNAL_STORAGE	read the contents of your shared storage	Y
myColorado	READ_EXTERNAL_STORAGE	read the contents of your shared storage	Y
MySejahtera	READ_EXTERNAL_STORAGE	read the contents of your shared storage	Y
PC-Covid	READ_EXTERNAL_STORAGE	read the contents of your shared storage	Y
PeduliLindungi	READ_EXTERNAL_STORAGE	read the contents of your shared storage	Y
PocketVax	READ_EXTERNAL_STORAGE	read the contents of your shared storage	Y
Siqi	READ_EXTERNAL_STORAGE	read the contents of your shared storage	Y
Tarassud+	READ_EXTERNAL_STORAGE	read the contents of your shared storage	Y
TraceTogether	READ_EXTERNAL_STORAGE	read the contents of your shared storage	Y
United Airlines	READ_EXTERNAL_STORAGE	read the contents of your shared storage	Y
Life Fits Into Home	READ_GSERVICES	.	N
United Airlines	READ_GSERVICES	.	N
CANImmunize	READ_PHONE_STATE	read phone status and identity	Y
EarthMed GO	READ_PHONE_STATE	read phone status and identity	Y
United Airlines	READ_PHONE_STATE	read phone status and identity	Y
Alhosn	READ_SETTINGS	.	N
Alhosn	READ_SETTINGS	.	N
Alhosn	READ_SETTINGS	.	N
Coronavirus UY	READ_SETTINGS	.	N
Coronavirus UY	READ_SETTINGS	.	N
Coronavirus UY	READ_SETTINGS	.	N
PC-Covid	READ_SETTINGS	.	N
PC-Covid	READ_SETTINGS	.	N
PC-Covid	READ_SETTINGS	.	N
PocketVax	READ_SETTINGS	.	N
PocketVax	READ_SETTINGS	.	N
PocketVax	READ_SETTINGS	.	N
หมอพร้อม	READ_SETTINGS	.	N
หมอพร้อม	READ_SETTINGS	.	N
หมอพร้อม	READ_SETTINGS	.	N
EHTERAZ	REBOOT	.	N
401Health	RECEIVE	.	N
Aarogya Setu	RECEIVE	.	N
Alhosn	RECEIVE	.	N
ArriveCAN	RECEIVE	.	N
CANImmunize	RECEIVE	.	N
CLEAR	RECEIVE	.	N
ConecteSUS	RECEIVE	.	N
Coronavirus UY	RECEIVE	.	N
DHA	RECEIVE	.	N
e-Tǝbib	RECEIVE	.	N
Egypt Health Passport	RECEIVE	.	N
Healthy Together	RECEIVE	.	N
HMH Well	RECEIVE	.	N
Immune	RECEIVE	.	N
immuny	RECEIVE	.	N
LA Wallet	RECEIVE	.	N
LeaveHomeSafe	RECEIVE	.	N
Life Fits Into Home	RECEIVE	.	N
mojelKP	RECEIVE	.	N
myColorado	RECEIVE	.	N
MySejahtera	RECEIVE	.	N
NHS App	RECEIVE	.	N
NLVaxPass	RECEIVE	.	N
PC-Covid	RECEIVE	.	N
PeduliLindungi	RECEIVE	.	N
PocketVax	RECEIVE	.	N
Service NSW	RECEIVE	.	N
Tarassud+	RECEIVE	.	N
Tawakkalna (Covid-19 KSA)	RECEIVE	.	N
TraceTogether	RECEIVE	.	N
United Airlines	RECEIVE	.	N
หมอพร้อม	RECEIVE	.	N
Aarogya Setu	RECEIVE_BOOT_COMPLETED	run at startup	N
CANImmunize	RECEIVE_BOOT_COMPLETED	run at startup	N
CLEAR	RECEIVE_BOOT_COMPLETED	run at startup	N
CommonHealth	RECEIVE_BOOT_COMPLETED	run at startup	N
Coronavirus UY	RECEIVE_BOOT_COMPLETED	run at startup	N
Covid Cert	RECEIVE_BOOT_COMPLETED	run at startup	N
DHA	RECEIVE_BOOT_COMPLETED	run at startup	N
e-Tǝbib	RECEIVE_BOOT_COMPLETED	run at startup	N
EHTERAZ	RECEIVE_BOOT_COMPLETED	run at startup	N
Healthy Together	RECEIVE_BOOT_COMPLETED	run at startup	N
HMH Well	RECEIVE_BOOT_COMPLETED	run at startup	N
Immune	RECEIVE_BOOT_COMPLETED	run at startup	N
LeaveHomeSafe	RECEIVE_BOOT_COMPLETED	run at startup	N
Life Fits Into Home	RECEIVE_BOOT_COMPLETED	run at startup	N
mojelKP	RECEIVE_BOOT_COMPLETED	run at startup	N
MySejahtera	RECEIVE_BOOT_COMPLETED	run at startup	N
PC-Covid	RECEIVE_BOOT_COMPLETED	run at startup	N
PeduliLindungi	RECEIVE_BOOT_COMPLETED	run at startup	N
PocketVax	RECEIVE_BOOT_COMPLETED	run at startup	N
Service NSW	RECEIVE_BOOT_COMPLETED	run at startup	N
Tarassud+	RECEIVE_BOOT_COMPLETED	run at startup	N
Tawakkalna (Covid-19 KSA)	RECEIVE_BOOT_COMPLETED	run at startup	N
TousAntiCovid	RECEIVE_BOOT_COMPLETED	run at startup	N
TraceTogether	RECEIVE_BOOT_COMPLETED	run at startup	N
United Airlines	RECEIVE_BOOT_COMPLETED	run at startup	N
Coronavirus UY	RECORD_AUDIO	record audio	Y
DHA	RECORD_AUDIO	record audio	Y
EarthMed GO	RECORD_AUDIO	record audio	Y
Life Fits Into Home	RECORD_AUDIO	record audio	Y
Siqi	RECORD_AUDIO	record audio	Y
United Airlines	RECORD_AUDIO	record audio	Y
CommonHealth	REORDER_TASKS	reorder running apps	N
e-Tǝbib	REQUEST_IGNORE_BATTERY_OPTIMIZATIONS	ask to ignore battery optimizations	N
Life Fits Into Home	REQUEST_IGNORE_BATTERY_OPTIMIZATIONS	ask to ignore battery optimizations	N
PC-Covid	REQUEST_IGNORE_BATTERY_OPTIMIZATIONS	ask to ignore battery optimizations	N
TousAntiCovid	REQUEST_IGNORE_BATTERY_OPTIMIZATIONS	ask to ignore battery optimizations	N
TraceTogether	REQUEST_IGNORE_BATTERY_OPTIMIZATIONS	ask to ignore battery optimizations	N
Life Fits Into Home	REQUEST_INSTALL_PACKAGES	request install packages	N
My Bindle	REQUEST_INSTALL_PACKAGES	request install packages	N
MySejahtera	REQUEST_INSTALL_PACKAGES	request install packages	N
PC-Covid	REQUEST_INSTALL_PACKAGES	request install packages	N
Tarassud+	REQUEST_INSTALL_PACKAGES	request install packages	N
Tawakkalna (Covid-19 KSA)	REQUEST_INSTALL_PACKAGES	request install packages	N
TraceTogether	REQUEST_INSTALL_PACKAGES	request install packages	N
DHA	SCHEDULE_EXACT_ALARM	.	N
Service NSW	SCHEDULE_EXACT_ALARM	.	N
CANImmunize	SYSTEM_ALERT_WINDOW	this app can appear on top of other apps	Y
EHTERAZ	SYSTEM_ALERT_WINDOW	this app can appear on top of other apps	Y
GHA COVID Pass	SYSTEM_ALERT_WINDOW	this app can appear on top of other apps	Y
NLVaxPass	SYSTEM_ALERT_WINDOW	this app can appear on top of other apps	Y
United Airlines	SYSTEM_ALERT_WINDOW	this app can appear on top of other apps	Y
Alhosn	UPDATE_BADGE	.	N
Coronavirus UY	UPDATE_BADGE	.	N
PC-Covid	UPDATE_BADGE	.	N
PocketVax	UPDATE_BADGE	.	N
หมอพร้อม	UPDATE_BADGE	.	N
Alhosn	UPDATE_COUNT	.	N
Coronavirus UY	UPDATE_COUNT	.	N
PC-Covid	UPDATE_COUNT	.	N
PocketVax	UPDATE_COUNT	.	N
หมอพร้อม	UPDATE_COUNT	.	N
Alhosn	UPDATE_SHORTCUT	.	N
Coronavirus UY	UPDATE_SHORTCUT	.	N
PC-Covid	UPDATE_SHORTCUT	.	N
PocketVax	UPDATE_SHORTCUT	.	N
หมอพร้อม	UPDATE_SHORTCUT	.	N
401Health	USE_BIOMETRIC	use biometric hardware	N
CommonHealth	USE_BIOMETRIC	use biometric hardware	N
Coronapas	USE_BIOMETRIC	use biometric hardware	N
DHA	USE_BIOMETRIC	use biometric hardware	N
Egypt Health Passport	USE_BIOMETRIC	use biometric hardware	N
Healthy Together	USE_BIOMETRIC	use biometric hardware	N
HMH Well	USE_BIOMETRIC	use biometric hardware	N
Immune	USE_BIOMETRIC	use biometric hardware	N
LA Wallet	USE_BIOMETRIC	use biometric hardware	N
LeaveHomeSafe	USE_BIOMETRIC	use biometric hardware	N
mojelKP	USE_BIOMETRIC	use biometric hardware	N
myColorado	USE_BIOMETRIC	use biometric hardware	N
NHS App	USE_BIOMETRIC	use biometric hardware	N
NYC COVID SAFE	USE_BIOMETRIC	use biometric hardware	N
Service NSW	USE_BIOMETRIC	use biometric hardware	N
Siqi	USE_BIOMETRIC	use biometric hardware	N
Tawakkalna (Covid-19 KSA)	USE_BIOMETRIC	use biometric hardware	N
Tečka	USE_BIOMETRIC	use biometric hardware	N
United Airlines	USE_BIOMETRIC	use biometric hardware	N
LeaveHomeSafe	USE_COMPONENT	.	N
immuny	USE_CREDENTIALS	.	N
401Health	USE_FINGERPRINT	use fingerprint hardware	N
CANImmunize	USE_FINGERPRINT	use fingerprint hardware	N
CommonHealth	USE_FINGERPRINT	use fingerprint hardware	N
Coronapas	USE_FINGERPRINT	use fingerprint hardware	N
DHA	USE_FINGERPRINT	use fingerprint hardware	N
Egypt Health Passport	USE_FINGERPRINT	use fingerprint hardware	N
Healthy Together	USE_FINGERPRINT	use fingerprint hardware	N
HMH Well	USE_FINGERPRINT	use fingerprint hardware	N
Immune	USE_FINGERPRINT	use fingerprint hardware	N
LA Wallet	USE_FINGERPRINT	use fingerprint hardware	N
LeaveHomeSafe	USE_FINGERPRINT	use fingerprint hardware	N
mojelKP	USE_FINGERPRINT	use fingerprint hardware	N
myColorado	USE_FINGERPRINT	use fingerprint hardware	N
NHS App	USE_FINGERPRINT	use fingerprint hardware	N
NYC COVID SAFE	USE_FINGERPRINT	use fingerprint hardware	N
Service NSW	USE_FINGERPRINT	use fingerprint hardware	N
Siqi	USE_FINGERPRINT	use fingerprint hardware	N
Tawakkalna (Covid-19 KSA)	USE_FINGERPRINT	use fingerprint hardware	N
Tečka	USE_FINGERPRINT	use fingerprint hardware	N
United Airlines	USE_FINGERPRINT	use fingerprint hardware	N
Service NSW	USE_FULL_SCREEN_INTENT	display notifications as full screen activities on a locked device	N
Alhosn	VIBRATE	control vibration	N
CANImmunize	VIBRATE	control vibration	N
CLEAR	VIBRATE	control vibration	N
ConecteSUS	VIBRATE	control vibration	N
Coronapas	VIBRATE	control vibration	N
Coronavirus UY	VIBRATE	control vibration	N
DHA	VIBRATE	control vibration	N
e-Tǝbib	VIBRATE	control vibration	N
EarthMed GO	VIBRATE	control vibration	N
EHTERAZ	VIBRATE	control vibration	N
Healthy Together	VIBRATE	control vibration	N
HMH Well	VIBRATE	control vibration	N
immuny	VIBRATE	control vibration	N
LA Wallet	VIBRATE	control vibration	N
LeaveHomeSafe	VIBRATE	control vibration	N
Life Fits Into Home	VIBRATE	control vibration	N
NHS App	VIBRATE	control vibration	N
NLVaxPass	VIBRATE	control vibration	N
PC-Covid	VIBRATE	control vibration	N
PeduliLindungi	VIBRATE	control vibration	N
PocketVax	VIBRATE	control vibration	N
Service NSW	VIBRATE	control vibration	N
Tarassud+	VIBRATE	control vibration	N
Tawakkalna (Covid-19 KSA)	VIBRATE	control vibration	N
TraceTogether	VIBRATE	control vibration	N
United Airlines	VIBRATE	control vibration	N
หมอพร้อม	VIBRATE	control vibration	N
United Airlines	VIDEO_CAPTURE	.	N
401Health	WAKE_LOCK	prevent phone from sleeping	N
Aarogya Setu	WAKE_LOCK	prevent phone from sleeping	N
Alhosn	WAKE_LOCK	prevent phone from sleeping	N
ArriveCAN	WAKE_LOCK	prevent phone from sleeping	N
CANImmunize	WAKE_LOCK	prevent phone from sleeping	N
CLEAR	WAKE_LOCK	prevent phone from sleeping	N
CommonHealth	WAKE_LOCK	prevent phone from sleeping	N
ConecteSUS	WAKE_LOCK	prevent phone from sleeping	N
Coronapas	WAKE_LOCK	prevent phone from sleeping	N
Coronavirus UY	WAKE_LOCK	prevent phone from sleeping	N
Covid Cert	WAKE_LOCK	prevent phone from sleeping	N
DHA	WAKE_LOCK	prevent phone from sleeping	N
e-Tǝbib	WAKE_LOCK	prevent phone from sleeping	N
Egypt Health Passport	WAKE_LOCK	prevent phone from sleeping	N
EHTERAZ	WAKE_LOCK	prevent phone from sleeping	N
Healthy Together	WAKE_LOCK	prevent phone from sleeping	N
HMH Well	WAKE_LOCK	prevent phone from sleeping	N
Immune	WAKE_LOCK	prevent phone from sleeping	N
immuny	WAKE_LOCK	prevent phone from sleeping	N
LA Wallet	WAKE_LOCK	prevent phone from sleeping	N
LeaveHomeSafe	WAKE_LOCK	prevent phone from sleeping	N
Life Fits Into Home	WAKE_LOCK	prevent phone from sleeping	N
mojelKP	WAKE_LOCK	prevent phone from sleeping	N
myColorado	WAKE_LOCK	prevent phone from sleeping	N
MySejahtera	WAKE_LOCK	prevent phone from sleeping	N
NHS App	WAKE_LOCK	prevent phone from sleeping	N
NLVaxPass	WAKE_LOCK	prevent phone from sleeping	N
NYC COVID SAFE	WAKE_LOCK	prevent phone from sleeping	N
NYS Excelsior Pass Wallet	WAKE_LOCK	prevent phone from sleeping	N
PC-Covid	WAKE_LOCK	prevent phone from sleeping	N
PeduliLindungi	WAKE_LOCK	prevent phone from sleeping	N
PocketVax	WAKE_LOCK	prevent phone from sleeping	N
Service NSW	WAKE_LOCK	prevent phone from sleeping	N
Tarassud+	WAKE_LOCK	prevent phone from sleeping	N
Tawakkalna (Covid-19 KSA)	WAKE_LOCK	prevent phone from sleeping	N
Tečka	WAKE_LOCK	prevent phone from sleeping	N
TousAntiCovid	WAKE_LOCK	prevent phone from sleeping	N
TraceTogether	WAKE_LOCK	prevent phone from sleeping	N
United Airlines	WAKE_LOCK	prevent phone from sleeping	N
หมอพร้อม	WAKE_LOCK	prevent phone from sleeping	N
Alhosn	WRITE	.	N
Coronavirus UY	WRITE	.	N
PC-Covid	WRITE	.	N
PocketVax	WRITE	.	N
หมอพร้อม	WRITE	.	N
CANImmunize	WRITE_CALENDAR	add or modify calendar events and send email to guest without owners’ knowledge	Y
DHA	WRITE_CALENDAR	add or modify calendar events and send email to guest without owners’ knowledge	Y
NHS App	WRITE_CALENDAR	add or modify calendar events and send email to guest without owners’ knowledge	Y
United Airlines	WRITE_CALENDAR	add or modify calendar events and send email to guest without owners’ knowledge	Y
Aarogya Setu	WRITE_EXTERNAL_STORAGE	modify or delete the contents of your shared storage	Y
CANImmunize	WRITE_EXTERNAL_STORAGE	modify or delete the contents of your shared storage	Y
ConecteSUS	WRITE_EXTERNAL_STORAGE	modify or delete the contents of your shared storage	Y
DHA	WRITE_EXTERNAL_STORAGE	modify or delete the contents of your shared storage	Y
EarthMed GO	WRITE_EXTERNAL_STORAGE	modify or delete the contents of your shared storage	Y
Egypt Health Passport	WRITE_EXTERNAL_STORAGE	modify or delete the contents of your shared storage	Y
HMH Well	WRITE_EXTERNAL_STORAGE	modify or delete the contents of your shared storage	Y
Immune	WRITE_EXTERNAL_STORAGE	modify or delete the contents of your shared storage	Y
LA Wallet	WRITE_EXTERNAL_STORAGE	modify or delete the contents of your shared storage	Y
Life Fits Into Home	WRITE_EXTERNAL_STORAGE	modify or delete the contents of your shared storage	Y
My Bindle	WRITE_EXTERNAL_STORAGE	modify or delete the contents of your shared storage	Y
myColorado	WRITE_EXTERNAL_STORAGE	modify or delete the contents of your shared storage	Y
MySejahtera	WRITE_EXTERNAL_STORAGE	modify or delete the contents of your shared storage	Y
NHS App	WRITE_EXTERNAL_STORAGE	modify or delete the contents of your shared storage	Y
PC-Covid	WRITE_EXTERNAL_STORAGE	modify or delete the contents of your shared storage	Y
PeduliLindungi	WRITE_EXTERNAL_STORAGE	modify or delete the contents of your shared storage	Y
PocketVax	WRITE_EXTERNAL_STORAGE	modify or delete the contents of your shared storage	Y
Siqi	WRITE_EXTERNAL_STORAGE	modify or delete the contents of your shared storage	Y
Tarassud+	WRITE_EXTERNAL_STORAGE	modify or delete the contents of your shared storage	Y
United Airlines	WRITE_EXTERNAL_STORAGE	modify or delete the contents of your shared storage	Y
หมอพร้อม	WRITE_EXTERNAL_STORAGE	modify or delete the contents of your shared storage	Y
United Airlines	WRITE_INTERNAL_STORAGE	.	N
Alhosn	WRITE_SETTINGS	.	Y
Coronavirus UY	WRITE_SETTINGS	.	Y
EarthMed GO	WRITE_SETTINGS	modify system settings	Y
NLVaxPass	WRITE_SETTINGS	modify system settings	Y
NYS Excelsior Pass Wallet	WRITE_SETTINGS	modify system settings	Y
PC-Covid	WRITE_SETTINGS	.	Y
PocketVax	WRITE_SETTINGS	.	Y
United Airlines	WRITE_SETTINGS	modify system settings	Y
หมอพร้อม	WRITE_SETTINGS	.	Y
DHA	WRITE_USE_APP_FEATURE_SURVEY	.	N
LA Wallet	WRITE_USE_APP_FEATURE_SURVEY	.	N

## Sheet: Trackers - Details
App	Tracker	Description
DHA	AltBeacon	.
e-Tǝbib	AltBeacon	.
EHTERAZ	AltBeacon	.
HMH Well	AltBeacon	.
PC-Covid	AltBeacon	.
Tarassud+	AltBeacon	.
หมอพร้อม	Appcelerator Analytics	analytics
DHA	Appdynamics	profiling
DHA	Appdynamics	analytics
CLEAR	Branch	analytics
CLEAR	Braze (formerly Appboy)	location
CLEAR	Braze (formerly Appboy)	analytics
CLEAR	Braze (formerly Appboy)	advertisement
United Airlines	Button	profiling
United Airlines	Button	identification
United Airlines	Button	analytics
CANImmunize	Facebook Analytics	analytics
e-Tǝbib	Facebook Analytics	analytics
CANImmunize	Facebook Login	identification
e-Tǝbib	Facebook Login	identification
CANImmunize	Facebook Places	.
CANImmunize	Facebook Share	.
e-Tǝbib	Facebook Share	.
PC-Covid	Google AdMob	advertisement
United Airlines	Google AdMob	advertisement
401Health	Google CrashLytics	crash reporting
Aarogya Setu	Google CrashLytics	crash reporting
ArriveCAN	Google CrashLytics	crash reporting
CANImmunize	Google CrashLytics	crash reporting
Coronavirus UY	Google CrashLytics	crash reporting
e-Tǝbib	Google CrashLytics	crash reporting
GHA COVID Pass	Google CrashLytics	crash reporting
Healthy Together	Google CrashLytics	crash reporting
HMH Well	Google CrashLytics	crash reporting
Immune	Google CrashLytics	crash reporting
Life Fits Into Home	Google CrashLytics	crash reporting
mojelKP	Google CrashLytics	crash reporting
myColorado	Google CrashLytics	crash reporting
NYS Excelsior Pass Wallet	Google CrashLytics	crash reporting
PeduliLindungi	Google CrashLytics	crash reporting
Tawakkalna (Covid-19 KSA)	Google CrashLytics	crash reporting
Tečka	Google CrashLytics	crash reporting
TraceTogether	Google CrashLytics	crash reporting
401Health	Google Firebase Analytics	analytics
Aarogya Setu	Google Firebase Analytics	analytics
ArriveCAN	Google Firebase Analytics	analytics
CANImmunize	Google Firebase Analytics	analytics
CLEAR	Google Firebase Analytics	analytics
ConecteSUS	Google Firebase Analytics	analytics
Coronavirus UY	Google Firebase Analytics	analytics
DHA	Google Firebase Analytics	analytics
e-Tǝbib	Google Firebase Analytics	analytics
Egypt Health Passport	Google Firebase Analytics	analytics
Healthy Together	Google Firebase Analytics	analytics
HMH Well	Google Firebase Analytics	analytics
Immune	Google Firebase Analytics	analytics
immuny	Google Firebase Analytics	analytics
LA Wallet	Google Firebase Analytics	analytics
Life Fits Into Home	Google Firebase Analytics	analytics
mojelKP	Google Firebase Analytics	analytics
myColorado	Google Firebase Analytics	analytics
MySejahtera	Google Firebase Analytics	analytics
NHS App	Google Firebase Analytics	analytics
NYS Excelsior Pass Wallet	Google Firebase Analytics	analytics
PC-Covid	Google Firebase Analytics	analytics
PeduliLindungi	Google Firebase Analytics	analytics
PocketVAX	Google Firebase Analytics	analytics
Service NSW	Google Firebase Analytics	analytics
Tarassud+	Google Firebase Analytics	analytics
Tawakkalna (Covid-19 KSA)	Google Firebase Analytics	analytics
Tečka	Google Firebase Analytics	analytics
TraceTogether	Google Firebase Analytics	analytics
United Airlines	Google Firebase Analytics	analytics
หมอพร้อม	Google Firebase Analytics	analytics
CLEAR	Heap	analytics
Coronavirus UY	Huawei Mobile Services (HMS) Core	location
Life Fits Into Home	Huawei Mobile Services (HMS) Core	location
Tarassud+	Huawei Mobile Services (HMS) Core	location
Tawakkalna (Covid-19 KSA)	Huawei Mobile Services (HMS) Core	location
TraceTogether	Huawei Mobile Services (HMS) Core	location
Coronavirus UY	Huawei Mobile Services (HMS) Core	analytics
Life Fits Into Home	Huawei Mobile Services (HMS) Core	analytics
Tarassud+	Huawei Mobile Services (HMS) Core	analytics
Tawakkalna (Covid-19 KSA)	Huawei Mobile Services (HMS) Core	analytics
TraceTogether	Huawei Mobile Services (HMS) Core	analytics
Coronavirus UY	Huawei Mobile Services (HMS) Core	advertisement
Life Fits Into Home	Huawei Mobile Services (HMS) Core	advertisement
Tarassud+	Huawei Mobile Services (HMS) Core	advertisement
Tawakkalna (Covid-19 KSA)	Huawei Mobile Services (HMS) Core	advertisement
TraceTogether	Huawei Mobile Services (HMS) Core	advertisement
United Airlines	Inmobi	.
United Airlines	Jumio	identification
United Airlines	Kochava	profiling
United Airlines	Kochava	analytics
United Airlines	Kochava	advertisement
NYC COVID SAFE	Localytics	profiling
NYC COVID SAFE	Localytics	analytics
United Airlines	Locuslabs	.
Healthy Together	Mapbox	.
United Airlines	Mapbox	.
COVIDCert NI	Microsoft Visual Studio App Center Analytics	analytics
LA Wallet	Microsoft Visual Studio App Center Analytics	analytics
COVIDCert NI	Microsoft Visual Studio App Center Crashes	crash reporting
LA Wallet	Microsoft Visual Studio App Center Crashes	crash reporting
Service NSW	New Relic	analytics
Coronavirus UY	OneSignal	.
PeduliLindungi	OpenTelemetry (OpenCensus, OpenTracing)	analytics
United Airlines	Qualtrics	.
CLEAR	Split	analytics
CLEAR	Splunk MINT	analytics
Database Information:
•If there is a ‘.’ in a cell, that means that the tracker/permission did not have any additional information
•Some apps have duplicate permissions because this is what Exodus had reported; since this is how it
was reported, the database will include the duplicates until further notice
•Some apps have trackers that serve multiple purposes; each purpose will be in an individual row for analytical reasons
